# Supplementary material for: In situ synthesis of hierarchical NiCo-MOF@Ni1−xCox(OH)2 heterostructures for enhanced pseudocapacitor and oxygen evolution reaction performances
Source: Royal Society of Chemistry journal article supplement (doi:10.1039/d0dt03872e), 2021-01-01
Supplement: d0dt03872e1.pdf [file d0dt03872e1.pdf]

## Electronic Supplementary Information

### **In-situ synthesis of hierarchical NiCo-MOF@Ni<sub>1-x</sub>Co<sub>x</sub>(OH)<sub>2</sub> heterostructures for enhanced pseudocapacitors and oxygen evolution reaction**

Chong Jiang<sup>a</sup>, Shuang Li<sup>a\*</sup>, Bo Li<sup>a</sup>, Shan Liu<sup>a</sup>, Wen-Wen Dong<sup>a</sup>, Ya-Pan Wu<sup>a</sup>, Zheng-Fang Tian<sup>b</sup>, Qichun Zhang<sup>c\*</sup>, Dong-Sheng Li<sup>a\*</sup>

*<sup>a</sup>College of Materials and Chemical Engineering, Key Laboratory of Inorganic Nonmetallic Crystalline and Energy Conversion Materials, China Three Gorges University, Yichang, 443002, P. R. China*

*<sup>b</sup>Hubei Key Laboratory of Processing and Application of Catalytic materials, Huanggang Normal University, Huanggang, 438000, P.R. China*

*<sup>c</sup>Department Materials Science and Engineering, City University of Hong Kong, Kowloon, Hong Kong SAR, 999077, P.R. China*

*E-mail address: lishmail@126.com; qiczhang@cityu.edu.hk ; lidongsheng1@126.com.*

## S1. Additional characterization information

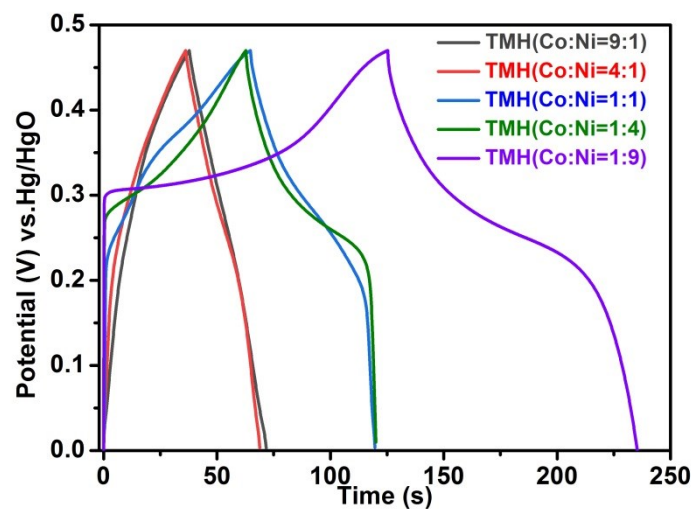

**Figure S1.** GCD curves at a current density of  $2 \text{ A g}^{-1}$  for TMH with different metal molar ratio. By comparison, the performance-optimal TMH with Ni/Co molar ratio = 9:1 was chose as precursor for the preparation of MOF.

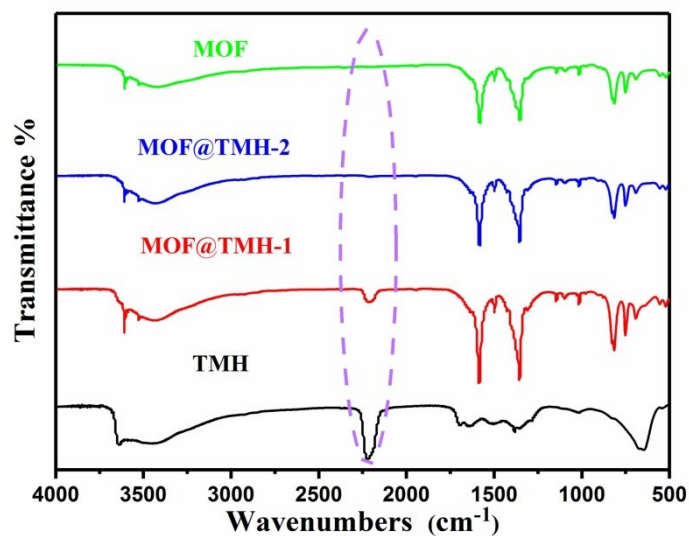

**Figure S2.** FT-IR spectra of the obtained TMH, MOF@TMH-1, MOF@TMH-2 and MOF.

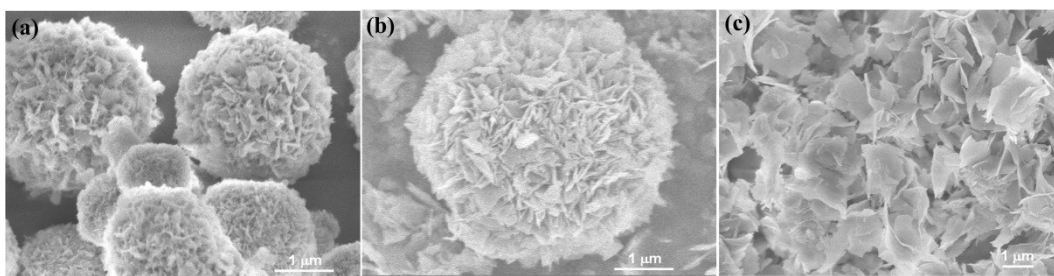

**Figure S3.** SEM images of the (a) TMH, (b) MOF@TMH-1 and (c) MOF.

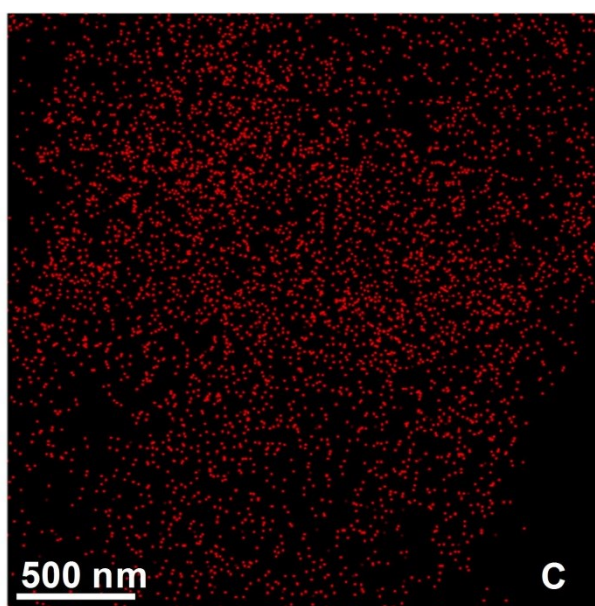

**Figure S4.** Elemental mapping image of carbon.

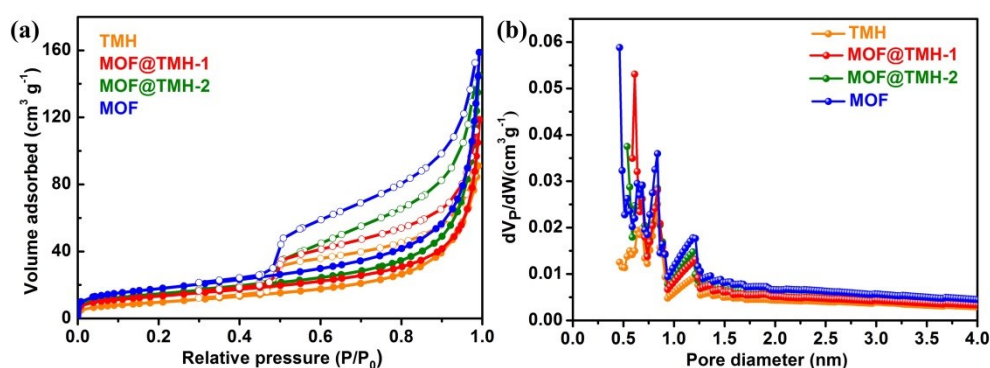

**Figure S5.** N<sub>2</sub> adsorption-desorption isotherm and pore-size distribution curve of the samples.

All samples show type-IV isotherms with a very distinct hysteresis loop of typical H3. The BET surface area of the MOF is 64.3 m<sup>2</sup> g<sup>-1</sup>, which is larger than that of MOF@TMH-2 (53.0 m<sup>2</sup> g<sup>-1</sup>), MOF@TMH-1 (48.1 m<sup>2</sup> g<sup>-1</sup>) and TMH (36.1 m<sup>2</sup> g<sup>-1</sup>).

The corresponding pore size distributions in Figure S4b shows the obvious micropore structure for the samples, from which the BDC form porous MOF with metal ions. Of note, although the specific surface area of MOF@TMH-2 is slightly lower than that of MOF, the hetero-junction formed by the presence of a small amount of TMH facilitates the charge transfer, thus resulting in its electrochemical performances are better than that of MOF.

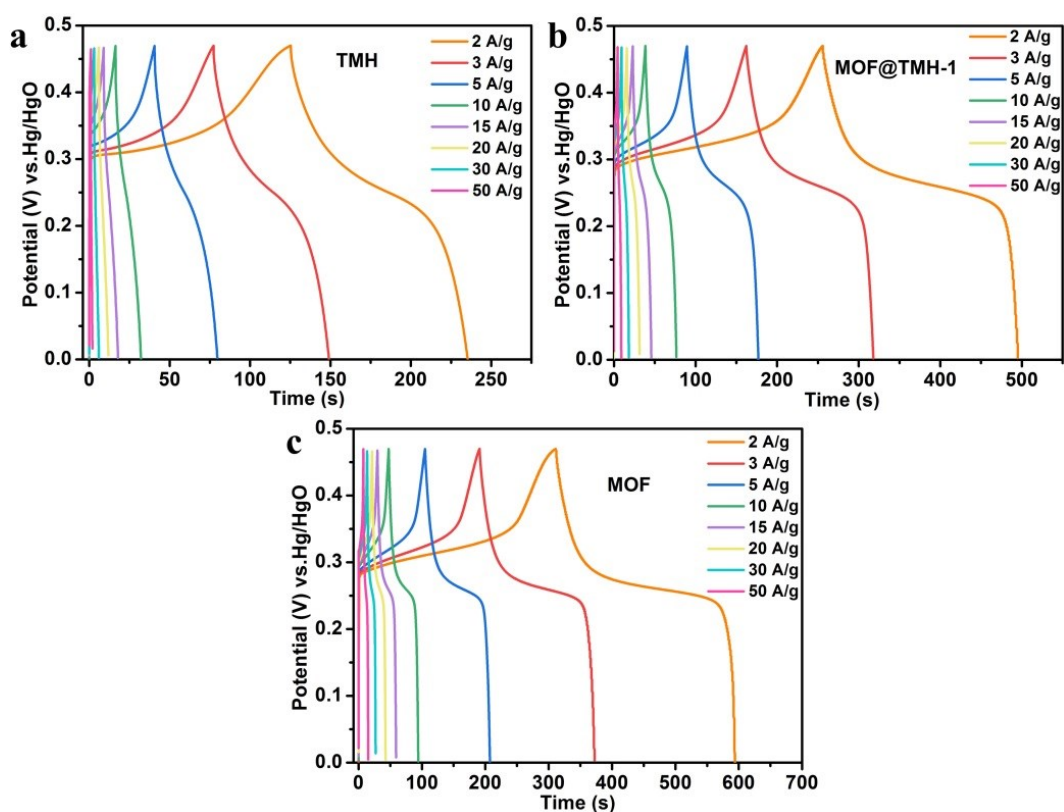

**Figure S6.** GCD curves at various current densities of TMH, MOF@TMH-1 and MOF.

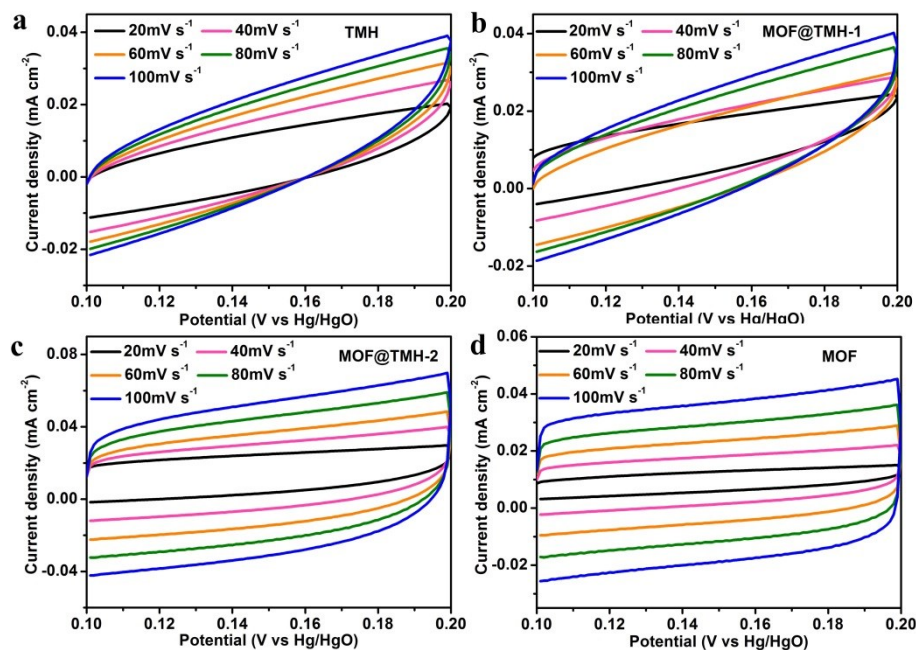

**Figure S7.** (a-d) Cyclic voltammetry curves of TMH, MOF@TMH-1, MOF@TMH-2 and MOF in the region of 0.1-0.2 V (vs Hg/HgO).

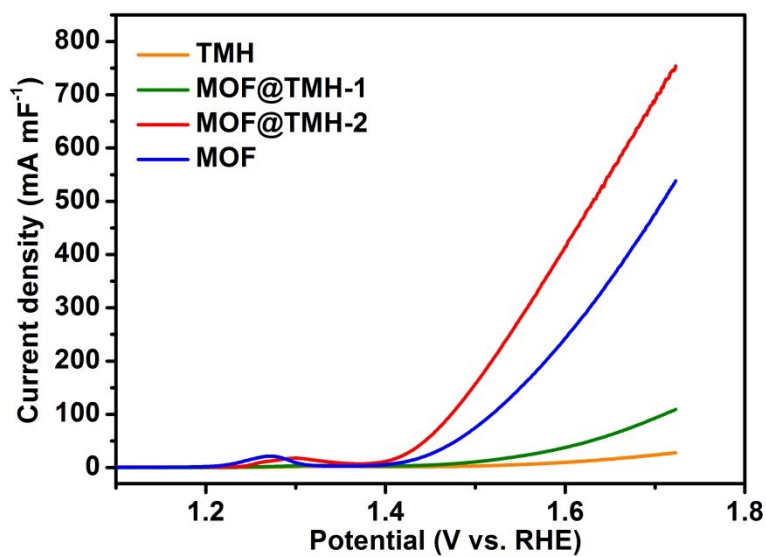

**Figure S8.** Polarization curves normalized by the  $C_{dl}$  of TMH, MOF@TMH-1, MOF@TMH-2 and MOF.

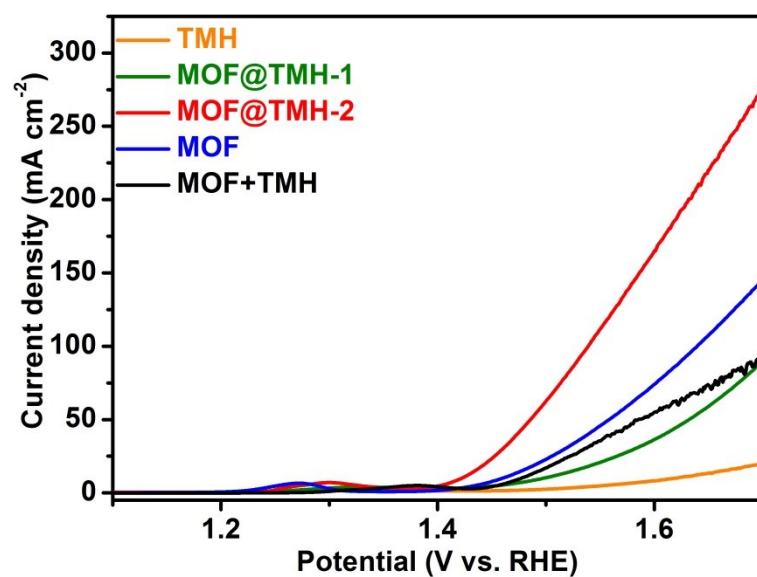

**Figure S9.** Polarization curves of TMH, MOF@TMH-1, MOF@TMH-2, MOF and MOF+TMH that prepared by mechanically mixed of TMH and NiCo-BDC.

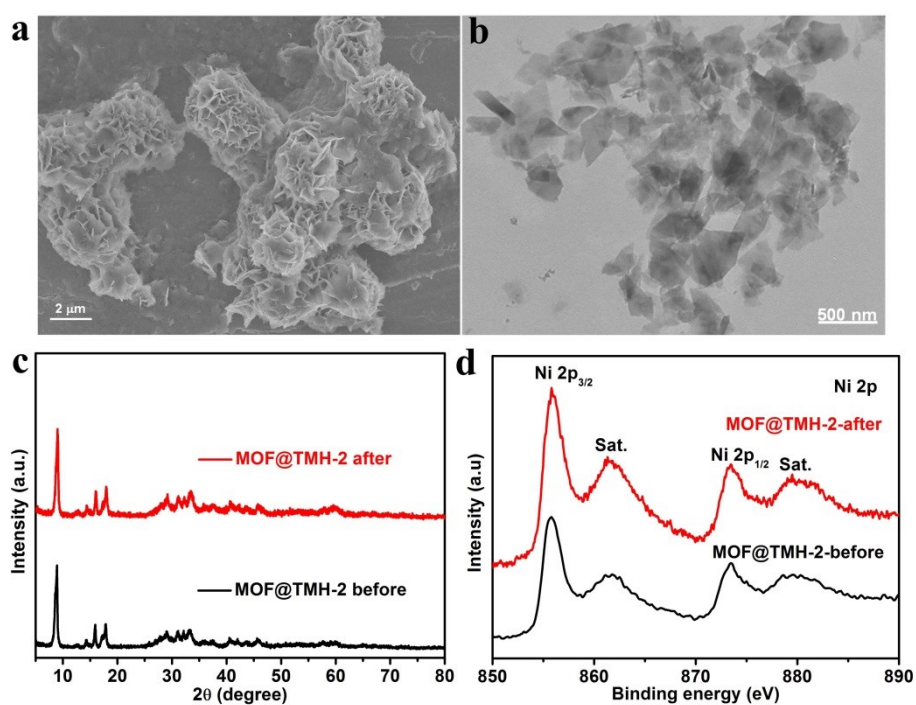

**Figure S10.** The SEM, TEM, XRD and XPS of MOF@TMH-2 after stability test.

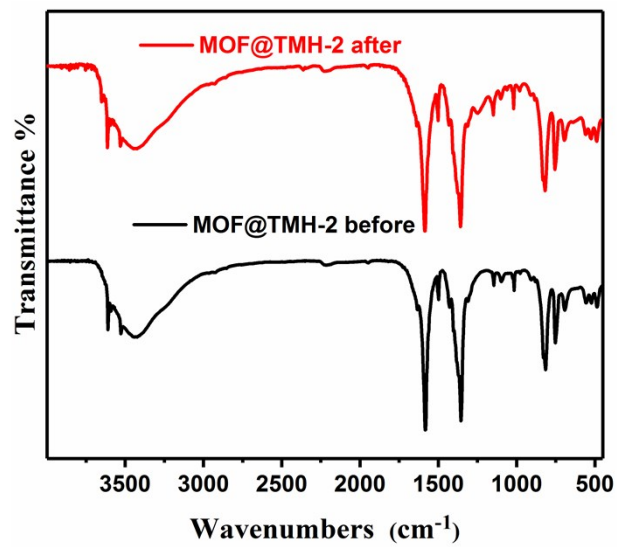

**Figure S11.** The FT-IR of MOF@TMH-2 after stability test.

**Table S1. Comparison of the specific capacitances of present work and the other electrode materials in a three-electrode system**

| Materials                                                            | Test Condition      | Specific capacitance (F g <sup>-1</sup> ) | Electrolyte solution | Current collector       | Ref.      |
|----------------------------------------------------------------------|---------------------|-------------------------------------------|----------------------|-------------------------|-----------|
| MOF@TMH-2                                                            | 2 A g <sup>-1</sup> | 1855.3                                    | 1 M KOH              | Glassy carbon disk (GC) | This work |
| PPy@NiCo(OH) <sub>2</sub>                                            | 2 A g <sup>-1</sup> | 1350.11                                   | 6 M KOH              | Ni foam (NF)            | 1         |
| CoNi-MOF                                                             | 2 A g <sup>-1</sup> | 1044                                      | 1 M KOH              | CFP                     | 2         |
| Ni-Co sulfides                                                       | 2 A g <sup>-1</sup> | 1304                                      | 6 M KOH              | NF                      | 3         |
| 2D Co-MOF Ns                                                         | 2 A g <sup>-1</sup> | 1106                                      | 3 M KOH              | NF                      | 4         |
| Co-MOF                                                               | 2 A g <sup>-1</sup> | 958.1                                     | 3 M KOH              | NF                      | 5         |
| CNT@Ni(OH) <sub>2</sub>                                              | 2 A g <sup>-1</sup> | 1136                                      | 1 M KOH              | NF                      | 6         |
| Ni/Co-LDH-7:3                                                        | 2 A g <sup>-1</sup> | 1626.4                                    | 6 M KOH              | NF                      | 7         |
| Co-Mn-HTS                                                            | 2 A g <sup>-1</sup> | 1093                                      | 2 M KOH              | NF                      | 8         |
| PPNF@Ni-Co MOF-3                                                     | 2 A g <sup>-1</sup> | 956.6                                     | 3 M KOH              | NF                      | 9         |
| NiCo-BDC nanosheets                                                  | 2 A g <sup>-1</sup> | 1296.33                                   | 1 M KOH              | NF                      | 10        |
| CNMO NWs                                                             | 2 A g <sup>-1</sup> | 554                                       | 1 M KOH              | NF                      | 11        |
| Porous Co <sub>3</sub> O <sub>4</sub> microspindles                  | 2 A g <sup>-1</sup> | 136                                       | 1 M KOH              | NF                      | 12        |
| NiCo <sub>2</sub> O <sub>4</sub> @MnO <sub>2</sub>                   | 2 A g <sup>-1</sup> | 688.4                                     | 1 M KOH              | NF                      | 13        |
| H-NiOOH/GS                                                           | 2 A g <sup>-1</sup> | 1160                                      | 2 M KOH              | NF                      | 14        |
| Ni/Co-MOF                                                            | 2 A g <sup>-1</sup> | 839                                       | 3 M KOH              | Stainless steel grid    | 15        |
| CoO/Co-Cu-S-2 HTHSs                                                  | 2 A g <sup>-1</sup> | 2300                                      | 6 M KOH              | NF                      | 16        |
| Ni <sub>3</sub> S <sub>2</sub> /CoNi <sub>2</sub> S <sub>4</sub> /NF | 2 A g <sup>-1</sup> | 2435                                      | 6 M KOH              | NF                      | 17        |



**Table S2. Comparison of the overpotential at 10 mA cm<sup>-2</sup> of present work and the other OER catalysts in a three-electrode system**

| Catalyst                                         | Electrolyte (KOH) | Substrate          | Overpotential (mV) (at 10 mA cm <sup>-2</sup> ) | Ref.      |
|--------------------------------------------------|-------------------|--------------------|-------------------------------------------------|-----------|
| MOF@TMH-2 (NiCo-BDC@NiCo(OH) <sub>2</sub> )      | 1 M               | glassy carbon (GC) | 193                                             | This work |
| NiCo-UMOFNs                                      | 1 M               | GC                 | 250                                             | 18        |
| Ni-BDC/Ni(OH) <sub>2</sub>                       | 1 M               | GC                 | 320                                             | 19        |
| MIL-88A/Ni(OH) <sub>2</sub> -CC                  | 1 M               | carbon cloth (CC)  | 250                                             | 20        |
| NiFe-UMNS                                        | 1 M               | GC                 | 260                                             | 21        |
| Fe-Ni LDH/MOFs                                   | 1 M               | GC                 | 255                                             | 22        |
| Fe(OH) <sub>3</sub> @Co-MOF-74                   | 1 M               | carbon paper(CP)   | 292                                             | 23        |
| NiCo-BDC BMNSs                                   | 1 M               | Ni foam (NF)       | 230                                             | 24        |
| CoFeCr LDH/NF                                    | 1 M               | NF                 | 200                                             | 25        |
| Ni-MOF@Fe-MOF powder                             | 1 M               | GC                 | 265                                             | 26        |
| NH <sub>2</sub> -MIL88B(Fe <sub>2</sub> Ni)      | 1 M               | NF                 | 240                                             | 27        |
| Ni <sub>3</sub> S <sub>2</sub> /Ni foam          | 1 M               | NF                 | 260                                             | 28        |
| Co-PB/Pt                                         | 1 M               | GC                 | 300                                             | 29        |
| Co(TCNQ) <sub>2</sub>                            | 1 M               | Co foil            | 310                                             | 30        |
| NF/NiFe-LDH                                      | 1 M               | NF                 | 250                                             | 31        |
| NF/Ni <sub>3</sub> S <sub>2</sub>                | 1 M               | NF                 | 260                                             | 32        |
| Co(OH)F/NF                                       | 1 M               | NF                 | 270                                             | 33        |
| FeNiOOH                                          | 1 M               | GC                 | 280                                             | 34        |
| Ni/Ni(OH) <sub>2</sub>                           | 1 M               | CP                 | 270                                             | 35        |
| Cu(OH) <sub>2</sub> /Co(OH) <sub>2</sub>         | 1 M               | Cu foil            | 283                                             | 36        |
| Co@CoO <sub>x</sub>                              | 1 M               | GC                 | 289                                             | 37        |
| Zn <sub>x</sub> Co <sub>3-x</sub> O <sub>4</sub> | 1 M               | Ti foil            | 320                                             | 38        |
| Pt QDs@Fe-MOF                                    | 1 M               | NF                 | 144                                             | 39        |
| Gelled-FeCoW                                     | 1 M               | Au foam            | 191                                             | 40        |

## References

1. X. Wu, M. Lian and Q. Wang, *Electrochim. Acta.*, 2019, **295**, 655-661.
2. T. Deng, Y. Lu, W. Zhang, M. Sui, X. Shi, D. Wang and W. Zheng, *Adv. Energy Mater.*, 2018, **8**, 1702294.
3. X. Li, Q. Li, Y. Wu, M. Rui and H. Zeng, *ACS Appl. Mater. Interfaces.*, 2015, **7**, 19316–19323.
4. Y. Zheng, S. Zheng, Y. Xu, H. Xue, C. Liu and H. Pang, *Chem. Eng. J.*, 2019, **373**, 1319-1328.
5. R. Ramachandran, C. Zhao, D. Luo, K. Wang and F. Wang, *Electrochim. Acta.*, 2018, **267**, 170–180.
6. H. Yi, H. Wang, Y. Jing, T. Peng, Y. Wang, J. Guo, Q. He, Z. Guo and X. Wang, *J. Mater. Chem. A.*, 2015, **3**, 19545.
7. Z. Xiao, Y. Mei, S. Yuan, H. Mei, B. Xu, Y. Bao, L. Fa, W. Kang, F. Da, R. Wang, L. Wang, S. Hu, D. Sun and H-C. Zhou, *ACS Nano*, 2019, **13**, 7024–7030.
8. Y. Guo, L. Yu, C. Y. Wang, Z. Lin and X-W. (David) Lou, *Adv. Funct. Mater.*, 2015, **25**, 5184-5189.
9. D. Tian, N. Song, M. Zhong, X. Lu and C. Wang, *ACS Appl. Mater. Interfaces*, 2020, **12**, 1280–1291.
10. H-M. Ma, J-W. Yi, S. Li, C. Jiang, J-H. Wei, Y-P. Wu, J. Zhao and D-S. Li , *Inorg. Chem.*, 2019, **58**, 9543–9547.
11. C. Yuan, L. Zhang, L. Hou, G. Pang and X. Zhang, *Part. Part. Syst. Charact.*, 2014, **31**, 778-787
12. W. Xu, T. T. Li and Y-Q. Zheng, *RSC. Adv.*, 2016, **6**, 86447-86454
13. Y. Zhang, B. Wang, F. Liu, J. Cheng, X. Zhang and L. Zhang, *Nano Energy*, 2016, **27**, 627-637
14. R. Wang, C. Xu and J-M. Lee, *Nano Energy*, 2016, **19**, 210-221.
15. H. G-Ranjbar, M. Soleimani and H. R. Nader, *New J. Chem.*, 2016, **40**, 9187-9193.
16. W. Lu, J. Shen, P. Zhang, Y. Zhong, Y. Hu and X. W. Lou, *Angew. Chem. Int. Ed.*, 2019, **58**, 15441-15447.
17. W. He, C. Wang, H. Li, X. Deng, X. Xu and T. Zhai, *Adv. Energy Mater.*, 2017, **7**, 1700983.
18. S. Zhao, Y. Wang, J. Dong, C-T. He, H. Yin, P. An, K. Zhao, X. Zhang, C. Gao, L. Zhang, J. Lv, J. Wang, J. Zhang, A. M. Khattak, N. A. Khan, Z. Wei, J. Zhang, S. Liu, H. Zhao and Z. Tang, *Nat. Energy.*, 2016, **1**, 16184.
19. D. Zhu, J. Liu, L. Wang, Y. Du, Y. Zheng, K. Daveya and S-Z. Qiao, *Nanoscale*, 2019, **11**, 3599–3605.
20. Z. Qian, K. Wang, K. Shi, Z. Fu, Z. Mai, X. Wang, Z. Tang and Y. Tian, *J. Mater. Chem. A.*, 2020, **8**, 3311-3321.
21. G. Hai, X. Jia, K. Zhang, X. Liu, Z. Wu and G. Wang, *Nano Energy*, 2018, **44**, 345-352.
22. J. Huo, Y. Wang, L. Yan, Y. Xue, S. Li, M. Hu, Y. Jiang and Q-G. Zhai, *Nanoscale*, 2020, **12**, 14514-14523.
23. Z. Gao, Z-W. Yu, F-Q. Liu, C. Yang, Y-H. Yuan, Y. Yu and F. Luo, *ChemSusChem*, 2019, **12**, 4623-4628.

24. B. Wang, J. Shang, C. Guo, J. Zhang, F. Zhu, A. Han and J. Liu, *Small*, 2019, **15**, 1804761.
25. Z. Wang, W. Liu, Y. Hu, M. Guan, L. Xu, H. Li, J. Bao and H. Li, *Appl. Catal. B-environ.*, 2020, **272**, 118959.
26. K. Rui, G. Zhao, Y. Chen, Y. Lin, Q. Zhou, J. Chen, J. Zhu, W. Sun, W. Huang and S. X. Dou, *Adv. Funct. Mater.*, 2018, **28**, 1801554.
27. D. S. Raja, X-F. Chuah and S-Y. Lu, *Adv. Energy Mater.*, 2018, **8**, 1801065.
28. L. Feng, G. Yu, Y. Wu, G. Li, H. Li, Y. Sun, T. Asefa, W. Chen and X. Zou, *J. Am. Chem. Soc.*, 2015, **137**, 14023-14026.
29. J. Guo, X. Zhang, Y. Sun, L. Tang, Q. Liu and X. Zhang, *ACS Sustainable Chem. Eng.*, 2017, **5**, 11577-11583.
30. Y. Wei, X. Ren, H. Ma, X. Sun, Y. Zhang, X. Kuang, T. Yan, D. Wu and Q. Wei, *Chem. Eur. J.*, 2018, **24**, 2075-2079.
31. J. Luo, J. Im, M.T. Mayer, M. Schreier, M.K. Nazeeruddin, N. Park, S.D. Tilley, H.J. Fan, M. Grätzel, *Science*, 2014, 345, 1593.
32. L. Feng, G. Yu, Y. Wu, G. Li, H. Li, Y. Sun, T. Asefa, W. Chen, X. Zou, *J. Am. Chem. Soc.*, 2015, **137**, 14023-14026.
33. M. Song, Z. Zhang, Q. Li, W. Jin, Z. Wu, G. Fu, X. Liu, *J. Mater. Chem. A.*, 2019, **7**, 3697-3703.
34. L. Trotochaud, S. L. Youg, J. K. Ranney and S. W. Boettcher, *J. Am. Chem. Soc.*, 2014, **136**, 6744-6753.
35. L. Dai, Z-N. Chen, L. Li, P. Yin, Z. Liu and H. Zhang, *Adv. Mater.*, 2020, **32**, 1906915.
36. S. Tang, X. Li, M. Courte, J. Peng and D. Fichou, *ChemCatChem.*, 2020, **12**, 1-7.
37. J. Qi, W. Zhang and R. Cao, *Chem. Commun.*, 2017, **53**, 9277-9280.
38. X. Liu, Z. Chang, L. Luo, T. Xu, X. Lei, J. Liu and X. Sun, *Chem. Mater.*, 2014, **26**, 1889-1895.
39. B. Ye, R. Jiang, Z. Yu, Y. Hou, J. Huang, B. Zhang, Y. Huang, Y. Zhang and R. Z. Zhang, *J. Catal.*, 2019, **380**, 307-317.
40. B. Zhang, X. Zhang, O. Voznyy, R. Comin, M. Bajdich, M. G-Melchor, L. Han, J. Xu, M. Liu, L. Zheng, F. P. G. Arquer, C. T. Dinh, F. Fan, M. Yuan, E. Yassitepe, N. Chen, T. Regier, P. Liu, Y. Li, P. D. Luna, A. Janmohamed, H. L. Xin, H. Yang, A. Vojvodic and E. H. Sargent, *Science*, 2016, **352**, 333-337.
